# Supplementary material
Source: publisher figshare collection journal article supplement (https://acs.figshare.com/ndownloader/files/31185905)
Supplement: Supplementary file 1 [file 31185905]

## **Supporting Information**

### **TITLE**

Structural and morphological properties of Wool Keratin and Cellulose Biocomposites Fabricated using Ionic Liquids

### **AUTHORS**

Karleena Rybacki<sup>1</sup>, Stacy A. Love<sup>1</sup>, Bailey Blessing<sup>2</sup>, Abneris Morales<sup>2</sup>, Emily McDermott<sup>2</sup>, Kaylyn Cai<sup>3</sup>, Xiao Hu<sup>4</sup>, and David Salas-de la Cruz<sup>1,2,\*</sup>

### **AFFILIATIONS**

<sup>1</sup>Center of Computational and Integrative Biology, Rutgers–Camden, NJ

<sup>2</sup>Department of Chemistry, Rutgers–Camden, NJ

<sup>3</sup>Department of Chemical and Biochemical Engineering, Rutgers University–New Brunswick

<sup>4</sup>Department of Physics and Astronomy, Rowan University, Glassboro, NJ

\*Corresponding Author

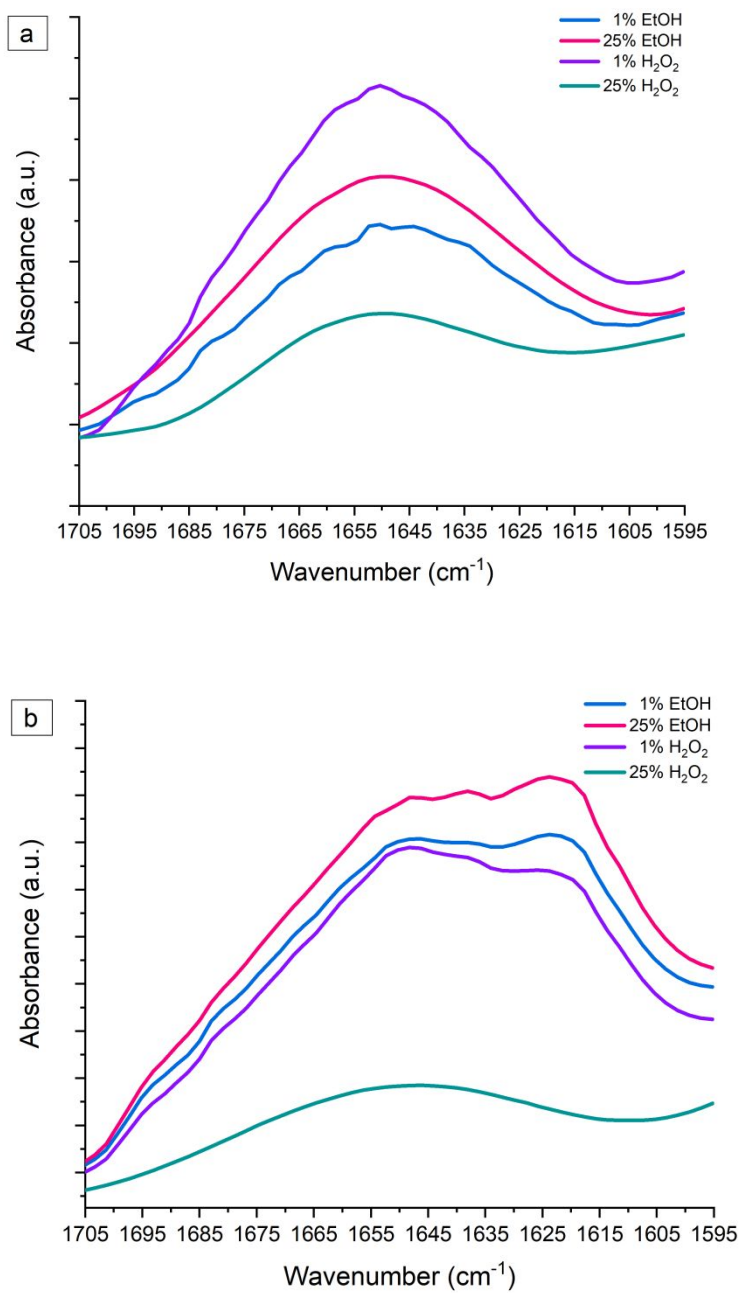

**Figure S-1.** The amide I bands located from 1705–1595 cm<sup>-1</sup> of 25% wool keratin 75% cellulose (a) and 75% wool keratin 25% cellulose (b).
